# Supplementary material for: Psychometric Properties of the Maternal and Paternal Parenting Styles Scale in Chilean Adolescents
Source: MDPI journal article supplement (doi:10.3390/ijerph18126229), 2021-06-09
Supplement: s1 [file s1]

### ESCALA DE ESTILOS EDUCATIVOS MATERNO Y PATERNO

| Puntúa en una escala del 1 al 6 cómo son de importantes para ti las siguientes cuestiones |                                                                             |                                    |                                 |                 |                               |
|-------------------------------------------------------------------------------------------|-----------------------------------------------------------------------------|------------------------------------|---------------------------------|-----------------|-------------------------------|
| Totalmente en<br>desacuerdo<br>1                                                          | En<br>desacuerdo<br>2                                                       | Parcialmente en<br>desacuerdo<br>3 | Parcialmente de<br>acuerdo<br>4 | De acuerdo<br>5 | Totalmente<br>de acuerdo<br>6 |
| 1                                                                                         | Disfruta hablando cosas conmigo                                             |                                    |                                 |                 |                               |
| 2                                                                                         | Con frecuencia pasa algún tiempo hablando conmigo                           |                                    |                                 |                 |                               |
| 3                                                                                         | Cuando hablo con él/ella muestra interés y atención                         |                                    |                                 |                 |                               |
| 4                                                                                         | Me siento apoyado y comprendido por él/ella                                 |                                    |                                 |                 |                               |
| 5                                                                                         | Me anima a que le cuente mis problemas y preocupaciones                     |                                    |                                 |                 |                               |
| 6                                                                                         | Me hace sentir mejor cuando estoy desanimado/a                              |                                    |                                 |                 |                               |
| 7                                                                                         | Si tengo algún problema puedo contar con su ayuda                           |                                    |                                 |                 |                               |
| 8                                                                                         | Muestra interés por mí cuando estoy triste y enfadado/a                     |                                    |                                 |                 |                               |
| 9                                                                                         | Me anima a que le diga lo que pienso aunque él/ella no esté de acuerdo      |                                    |                                 |                 |                               |
| 10                                                                                        | Me anima a que exprese mis ideas aunque no gusten a otras personas          |                                    |                                 |                 |                               |
| 11                                                                                        | Piensa que aunque aún no sea una persona adulta puedo tener ideas acertadas |                                    |                                 |                 |                               |
| 12                                                                                        | Me anima a que tome mis propias decisiones                                  |                                    |                                 |                 |                               |
| 13                                                                                        | Me anima que piense de forma independiente                                  |                                    |                                 |                 |                               |
| 14                                                                                        | Me permite opinar cuando hay que tomar una decisión familiar                |                                    |                                 |                 |                               |
| 15                                                                                        | Cuando quiere que haga algo me explica por qué quiere que lo haga           |                                    |                                 |                 |                               |
| 16                                                                                        | Me dice que siempre hay que mirar las dos caras de un problema              |                                    |                                 |                 |                               |
| 17                                                                                        | Intenta saber a dónde voy cuando salgo                                      |                                    |                                 |                 |                               |
| 18                                                                                        | Si vuelvo tarde a casa me pregunta por qué y con quién estuve               |                                    |                                 |                 |                               |
| 19                                                                                        | Cuando salgo un sábado noche debo decirle antes dónde voy y cuándo volveré  |                                    |                                 |                 |                               |
| 20                                                                                        | Intenta saber qué hago en mi tiempo libre                                   |                                    |                                 |                 |                               |
| 21                                                                                        | Pone límites a la hora a la que debo volver a casa                          |                                    |                                 |                 |                               |
| 22                                                                                        | Me pregunta en qué gasto el dinero                                          |                                    |                                 |                 |                               |
| 23                                                                                        | Es menos amable conmigo cuando no hago las cosas a su manera                |                                    |                                 |                 |                               |
| 24                                                                                        | Siempre me está diciéndome lo que tengo que hacer                           |                                    |                                 |                 |                               |
| 25                                                                                        | Me hace sentir culpable cuando no hago lo que quiere                        |                                    |                                 |                 |                               |
| 26                                                                                        | Me trata de forma fría y distante si hago algo que no le gusta              |                                    |                                 |                 |                               |
| 27                                                                                        | Me dice que él/ella tiene razón y no debo llevarla la contraria             |                                    |                                 |                 |                               |
| 28                                                                                        | Me castiga y sanciona sin darme explicaciones                               |                                    |                                 |                 |                               |
| 29                                                                                        | Intenta controlar continuamente mi forma de ser y pensar                    |                                    |                                 |                 |                               |
| 30                                                                                        | Deja de hablarme cuando se enfada conmigo                                   |                                    |                                 |                 |                               |
| 31                                                                                        | Le cuento lo que hago en mi tiempo libre                                    |                                    |                                 |                 |                               |
| 32                                                                                        | Le cuento lo que hago cuando salgo                                          |                                    |                                 |                 |                               |
| 33                                                                                        | Le hablo sobre los problemas que tengo con mis amigos y amigas              |                                    |                                 |                 |                               |
| 34                                                                                        | Cuando llego de la escuela le cuento cómo me ha ido el día                  |                                    |                                 |                 |                               |
| 35                                                                                        | Aunque no me pregunte, le cuento cómo me va en las diferentes asignaturas   |                                    |                                 |                 |                               |
| 36                                                                                        | Suele estar de buen humor                                                   |                                    |                                 |                 |                               |
| 37                                                                                        | Casi siempre es una persona alegre y optimista                              |                                    |                                 |                 |                               |
| 38                                                                                        | Suele bromear conmigo                                                       |                                    |                                 |                 |                               |
| 39                                                                                        | Es divertido hacer cosas con él/ella                                        |                                    |                                 |                 |                               |
| 40                                                                                        | Se ríe mucho conmigo                                                        |                                    |                                 |                 |                               |

|    |                                      |
|----|--------------------------------------|
| 41 | Suele estar tranquilo/a y relajado/a |
|----|--------------------------------------|
